# Supplementary material for: Integrative genetic analysis of mouse and human AML identifies cooperating disease alleles
Source: PubMed Central journal article supplement — J Exp Med. 2016 Jan 11;213(1):25–34. doi: 10.1084/jem.20150524 (PMC4710200; doi:10.1084/jem.20150524), 2016-01-11
Supplement: supp_jem.20150524_JEM_20150524_sm.pdf [file supp_jem.20150524_JEM_20150524_sm.pdf]

SUPPLEMENTAL MATERIAL

Hatlen et al., <http://www.jem.org/cgi/content/full/jem.20150524/DC1>

Table S1. The *TET2* mutations in AML patients from studies by the Cancer Genome Atlas Research Network (2013) and Patel et al. (2012)

| Patient database | Frequency of patients with a <i>TET2</i> mutation | <i>TET2</i> mutations | Effect     | t(8;21) status |
|------------------|---------------------------------------------------|-----------------------|------------|----------------|
| TCGA             | 2.00%                                             | Q481                  | Nonsense   | Negative       |
|                  |                                                   | R550                  | Nonsense   | Negative       |
|                  |                                                   | 315                   | Frameshift | Negative       |
| ECOG             | 9.55%                                             | 270                   | Frameshift | Negative       |
|                  |                                                   | S327X                 | Missense   | Negative       |
|                  |                                                   | P426L                 | Missense   | Negative       |
|                  |                                                   | K433X                 | Missense   | Negative       |
|                  |                                                   | E452A                 | Missense   | Negative       |
|                  |                                                   | R544X                 | Missense   | Negative       |
|                  |                                                   | R550X                 | Missense   | Negative       |
|                  |                                                   | 586                   | Frameshift | Negative       |
|                  |                                                   | Q622X                 | Missense   | Negative       |
|                  |                                                   | F868L                 | Missense   | Negative       |
|                  |                                                   | Q891X                 | Missense   | Negative       |
|                  |                                                   | 912                   | Frameshift | Negative       |
|                  |                                                   | Q916X                 | Missense   | Negative       |
|                  |                                                   | 921                   | Frameshift | Negative       |
|                  |                                                   | 958                   | Frameshift | Negative       |
|                  |                                                   | 966                   | Frameshift | Negative       |
|                  |                                                   | W1003X                | Missense   | Negative       |
|                  |                                                   | Q1021R                | Missense   | Negative       |
|                  |                                                   | 1034                  | Frameshift | Negative       |
|                  |                                                   | Q1084P                | Missense   | Negative       |
|                  |                                                   | 1114                  | Frameshift | Negative       |
|                  |                                                   | 1118                  | Frameshift | Negative       |
|                  |                                                   | E1141K                | Missense   | Negative       |
|                  |                                                   | H1219Y                | Missense   | Negative       |
|                  |                                                   | N1260K                | Missense   | Negative       |
|                  |                                                   | R1261C                | Missense   | Negative       |
|                  |                                                   | G1283D                | Missense   | Negative       |
|                  |                                                   | W1292R                | Missense   | Negative       |
| 1299             | Frameshift                                        | Negative              |            |                |
| 1322             | Frameshift                                        | Negative              |            |                |
| R1365H           | Missense                                          | <b>Positive</b>       |            |                |
| G1369V           | Frameshift                                        | Negative              |            |                |
| 1395             | Frameshift                                        | Negative              |            |                |
| E1405X           | Missense                                          | Negative              |            |                |
| 1439             | Frameshift                                        | <b>Positive</b>       |            |                |
| 1448             | Frameshift                                        | Negative              |            |                |
| S1486X           | Missense                                          | Negative              |            |                |
| Q1524X           | Missense                                          | Negative              |            |                |
| R1572W           | Missense                                          | Negative              |            |                |
| H1817N           | Missense                                          | Negative              |            |                |
| E1851K           | Missense                                          | <b>Positive</b>       |            |                |
| I1873T           | Missense                                          | Negative              |            |                |
| 1893             | Frameshift                                        | Negative              |            |                |
| R1896M           | Missense                                          | Negative              |            |                |
| S1898F           | Missense                                          | Negative              |            |                |
| Y1902X           | Missense                                          | Negative              |            |                |
| 1960             | Frameshift                                        | Negative              |            |                |
| P1962L           | Missense                                          | Negative              |            |                |

Table S2. **Statistics of *TET2* mutations in AML patients from the ECOG E1900 trial from the Patel et al. (2012) study**

| Given gene               | % Patients mutant for given gene | % Patients mutant for given gene and <i>TET2</i> | % Patients mutant for <i>TET2</i> that are mutant for given gene | % Patients mutant for given gene that are mutant for <i>TET2</i> | Tendency for mutations to co-occur |              |
|--------------------------|----------------------------------|--------------------------------------------------|------------------------------------------------------------------|------------------------------------------------------------------|------------------------------------|--------------|
|                          |                                  |                                                  |                                                                  |                                                                  | P-value                            | Adj. p-value |
| <i>FLT3</i>              | 36.93%                           | 3.27%                                            | 34.21%                                                           | 8.84%                                                            | 0.17                               | 1.00         |
| <i>NPM1</i>              | 29.65%                           | 3.02%                                            | 31.58%                                                           | 10.17%                                                           | 0.15                               | 1.00         |
| <i>DNMT3A</i>            | 25.63%                           | 2.01%                                            | 21.05%                                                           | 7.84%                                                            | 0.18                               | 1.00         |
| <i>NRAS</i>              | 10.30%                           | 1.76%                                            | 18.42%                                                           | 17.07%                                                           | 0.09                               | 1.00         |
| <i>RUNX1</i>             | 8.79%                            | 1.51%                                            | 15.79%                                                           | 17.14%                                                           | 0.09                               | 1.00         |
| <i>CBF</i>               | 18.09%                           | 1.26%                                            | 13.16%                                                           | 6.94%                                                            | 0.20                               | 1.00         |
| <i>ASXL1</i>             | 3.02%                            | 1.01%                                            | 10.53%                                                           | 33.33%                                                           | 0.03                               | 0.71         |
| <i>CEBPa</i>             | 9.55%                            | 1.01%                                            | 10.53%                                                           | 10.53%                                                           | 0.15                               | 1.00         |
| <i>WT1</i>               | 9.05%                            | 0.75%                                            | 7.89%                                                            | 8.33%                                                            | 0.18                               | 1.00         |
| <i>AML1-ETO</i>          | 7.29%                            | 0.75%                                            | 7.89%                                                            | 10.34%                                                           | 0.15                               | 1.00         |
| <i>PHF6</i>              | 3.27%                            | 0.50%                                            | 5.26%                                                            | 15.38%                                                           | 0.10                               | 1.00         |
| Monosomy 7               | 1.01%                            | 0.50%                                            | 5.26%                                                            | 50.00%                                                           | 0.01                               | 0.27         |
| <i>IDH2</i>              | 8.54%                            | 0.25%                                            | 2.63%                                                            | 2.94%                                                            | 0.29                               | 1.00         |
| <i>KIT</i>               | 5.78%                            | 0.25%                                            | 2.63%                                                            | 4.35%                                                            | 0.25                               | 1.00         |
| <i>TP53</i>              | 4.02%                            | 0.25%                                            | 2.63%                                                            | 6.25%                                                            | 0.21                               | 1.00         |
| <i>PTEN</i>              | 1.76%                            | 0.25%                                            | 2.63%                                                            | 14.29%                                                           | 0.11                               | 1.00         |
| <i>EVI1</i> <sup>+</sup> | 1.26%                            | 0.25%                                            | 2.63%                                                            | 20.00%                                                           | 0.07                               | 1.00         |
| split <i>MLL</i>         | 5.53%                            | 0.25%                                            | 2.63%                                                            | 4.55%                                                            | 0.25                               | 1.00         |
| Trisomy 8                | 3.77%                            | 0.25%                                            | 2.63%                                                            | 6.67%                                                            | 0.20                               | 1.00         |
| <i>IDH1</i>              | 6.28%                            | 0.00%                                            | 0.00%                                                            | 0.00%                                                            | 0.50                               | 1.00         |
| <i>KRAS</i>              | 2.76%                            | 0.00%                                            | 0.00%                                                            | 0.00%                                                            | 0.50                               | 1.00         |
| 5q deletion              | 1.51%                            | 0.00%                                            | 0.00%                                                            | 0.00%                                                            | 0.50                               | 1.00         |
| <i>MLL-PTD</i>           | 4.52%                            | 0.00%                                            | 0.00%                                                            | 0.00%                                                            | 0.50                               | 1.00         |
| t69                      | 0.50%                            | 0.00%                                            | 0.00%                                                            | 0.00%                                                            | 0.50                               | 1.00         |

Table S3. **The *PTPN11* mutations in AML patients from the Cancer Genome Atlas Research Network (2013) study**

| Patient database | Frequency of patients with a <i>PTPN11</i> mutation | <i>PTPN11</i> mutations | Effect   | t(8;21) status |
|------------------|-----------------------------------------------------|-------------------------|----------|----------------|
| TCGA             | 13.33%                                              | G60V                    | Missense | Negative       |
|                  |                                                     | D61Y                    | Missense | Negative       |
|                  |                                                     | D61V                    | Missense | Negative       |
|                  |                                                     | F71L                    | Missense | Negative       |
|                  |                                                     | T73I                    | Missense | Negative       |
|                  |                                                     | S189A                   | Missense | Negative       |
|                  |                                                     | Y197*                   | Nonsense | Negative       |
|                  |                                                     | L206L                   | Missense | Negative       |
|                  |                                                     | N308D                   | Missense | Negative       |
|                  |                                                     | S502P                   | Missense | Negative       |
|                  |                                                     | Q510L                   | Missense | Negative       |

**REFERENCES**

Cancer Genome Atlas Research Network. 2013. Genomic and epigenomic landscapes of adult de novo acute myeloid leukemia. *N. Engl. J. Med.* 368:2059–2074. <http://dx.doi.org/10.1056/NEJMoa1301689>

Patel, J.P., M. Gönen, M.E. Figueroa, H. Fernandez, Z. Sun, J. Racevskis, P. Van Vlierberghe, I. Dalgalev, S. Thomas, O. Aminova, et al. 2012. Prognostic relevance of integrated genetic profiling in acute myeloid leukemia. *N. Engl. J. Med.* 366:1079–1089. <http://dx.doi.org/10.1056/NEJMoa1112304>
